# Supplementary material for: ICP-MS-based characterization of inorganic nanoparticles—sample preparation and off-line fractionation strategies
Source: PubMed Central journal article supplement (PMC3885803; doi:10.1007/s00216-013-7480-2), 2013-12-01
Supplement: 216_2013_7480_MOESM1_ESM.pdf [file 216_2013_7480_MOESM1_ESM.pdf]

Analytical and Bioanalytical Chemistry

Electronic Supplementary Material

**ICP-MS-based characterization of inorganic nanoparticles—sample preparation and off-line fractionation strategies**

Anne-Lena Fabricius, Lars Duester, Björn Meermann, and Thomas A. Ternes

## Experimental

**Table S1.** Information about the nanoparticle suspensions used given by the manufacturer

|                            | AgPURE-W                    | TiO <sub>2</sub>       | CeO <sub>2</sub>                   | Au 10 nm                                                              | Au 200 nm                     | ZnO                              |
|----------------------------|-----------------------------|------------------------|------------------------------------|-----------------------------------------------------------------------|-------------------------------|----------------------------------|
|                            | ras materials GmbH, Germany | Laboratory synthesized | NYACOL; Nanotechnologies, Inc, USA | Sigma-Aldrich, Germany                                                |                               | Particular GmbH, Germany         |
| Concentration              | 10.0 ± 0.50 %               | 5.9 g/L                | 20 wt. %                           | 5.9 · 10 <sup>12</sup> part/mL                                        | 1.9 · 10 <sup>9</sup> part/mL | 100 mg/L                         |
| Additives                  | Ammonium nitrate (3-15%)    | None                   | Nitrate (0.2 mol/mol)              | Sodium citrate buffer (100 mg/L) + proprietary stabilizing surfactant |                               | Sodium citrate buffer (100 mg/L) |
| Core size; (diameter) [nm] | 15 (99% < 20)               | 100                    | 10-20                              | 8-12                                                                  | 180-220                       | -                                |
| Hydrodynamic diameter [nm] | -                           | -                      | -                                  | 18-30                                                                 | 175-235                       | 136.1 ± 4.2                      |

**Table S2.** Details about microwave assisted digestion procedures

|                                      | <b>Ag</b>                      | <b>TiO<sub>2</sub></b>          | <b>CeO<sub>2</sub></b>        | <b>ZnO</b>                   | <b>Au</b>                     |           |
|--------------------------------------|--------------------------------|---------------------------------|-------------------------------|------------------------------|-------------------------------|-----------|
| HNO <sub>3</sub> (65%)               | 1.4 mL                         | -                               | 1.2 mL                        | 0.35 mL                      | 0.35 mL                       |           |
| H <sub>2</sub> SO <sub>4</sub> (96%) | -                              | 1.4 mL                          | -                             | -                            | -                             |           |
| HCl (30%)                            | -                              | -                               | -                             | 1.05 mL                      | 1.05 mL                       |           |
| H <sub>2</sub> O <sub>2</sub> (30%)  | -                              | -                               | 0.2 mL                        | -                            | -                             |           |
| Vessel material                      | Teflon                         | Teflon                          | Teflon                        | Teflon                       | Glass                         |           |
| Internal Standard                    | Ru (1 mg/l) 0.1 mL             |                                 |                               |                              |                               |           |
| Sample                               | 0.5 mL                         |                                 |                               |                              |                               |           |
| Dilution                             | 1:100.000                      | 1:1.000                         | 1:100.000                     | 1:100                        | 1:100                         |           |
| Assumed concentration                | ~1 mg/L                        | ~5.9 mg/L                       | ~2 mg/L                       | ~1 mg/L                      | 99.4 µg/L*                    | 253 µg/L* |
| pH value                             | 5.8                            | 5.8                             | 4.5                           | 5.9                          | 6.2                           | 6.3       |
| Reference material                   | TMDA52.3**:<br>20.6 ± 1.8 µg/L | TMDA52.3**:<br>120.0 ± 7.6 µg/L | SPS-SW2***<br>2.5 ± 0.02 µg/L | TMDA**:<br>263.0 ± 25.3 µg/L | Noble metals****:<br>100 µg/L |           |
| ICP-element std                      | Ag (1 mg/L)                    | Ti (1 mg/L)                     | Ce (1 mg/L)                   | Zn (1 mg/L)                  | Au (1 mg/L)                   |           |

\* Conversion from concentrations given in particles/mL (information of the customer) to the concentration of Au in µg/L were conducted in accordance to [1].

\*\* Certified Reference Waters for Trace Elements, Environment Canada.

\*\*\* Surface water – trace metals, Spectrapure Standards, Norway.

\*\*\*\* VHG certified NIST-traceable multi element aqueous standard, VHG Labs, Inc (LGC standards), USA.

In case of Ag, TiO<sub>2</sub> and CeO<sub>2</sub> ENP suspensions the digestion procedure was carried out in Teflon vessels. For the Au ENP suspensions glass vials were used to avoid possible interaction with the Teflon surfaces. In case of ZnO, after testing both materials, also Teflon vials were chosen due to lower blank values and better recoveries. For ICP-MS measurements digested samples were transferred to polypropylene centrifuge tubes (VWR, Germany) or, in case of Au, to Rotilabo®-screw neck ND24 glass vials (Carl Roth, Germany).

**Table S3.** Parameters of ICP-QMS analysis

Isotopes of the elements analyzed and the respective limits of detection (LoD; blank + 3 sigma) and limits of quantification (LoQ; blank + 10 sigma; acidic and aqueous matrices). Collision cell modus, [He], was conducted at a helium gas flow of 3 ml/min. Certified concentrations of the reference materials (CRM) used for method validation are given for each element.

|         | <b>Ag</b> [ $\mu\text{g/L}$ ] |       | <b>Ti</b> [ $\mu\text{g/L}$ ]               |       | <b>Ce</b> [ $\mu\text{g/L}$ ] |       | <b>Zn</b> [ $\mu\text{g/L}$ ]              |       | <b>Au</b> [ $\mu\text{g/L}$ ] |       |
|---------|-------------------------------|-------|---------------------------------------------|-------|-------------------------------|-------|--------------------------------------------|-------|-------------------------------|-------|
| Isotope | $^{107}\text{Ag}$             |       | $^{47}\text{Ti}$ [He]                       |       | $^{140}\text{Ce}$             |       | $^{66}\text{Zn}$ [He]                      |       | $^{197}\text{Au}$             |       |
| Matrix  | acid                          | water | acid                                        | water | acid                          | water | acid                                       | water | acid                          | water |
| LoD     | 0.26                          | 0.21  | 0.71                                        | 0.18  | 0.21                          | 0.21  | 1.0                                        | 0.1   | 0.35                          | -     |
| LoQ     | 0.67                          | 0.61  | 1.73                                        | 0.49  | 0.64                          | 0.64  | 2.29                                       | 0.18  | 0.93                          | -     |
| CRM     | TMDA 52.3                     |       | TMDA 52.3                                   |       | SPS-SW2                       |       | TMDA 52.3                                  |       | Noble metals                  |       |
|         |                               |       | TM 27.3**:<br>$2.01 \pm 0.26 \mu\text{g/L}$ |       |                               |       | TM 27.3**:<br>$16.2 \pm 2.6 \mu\text{g/L}$ |       |                               |       |

\*\* Certified Reference Waters for Trace Elements, Environment Canada (see Table S2).

## Results and discussion

Fig. S1. TEM-images of nanoparticles suspensions

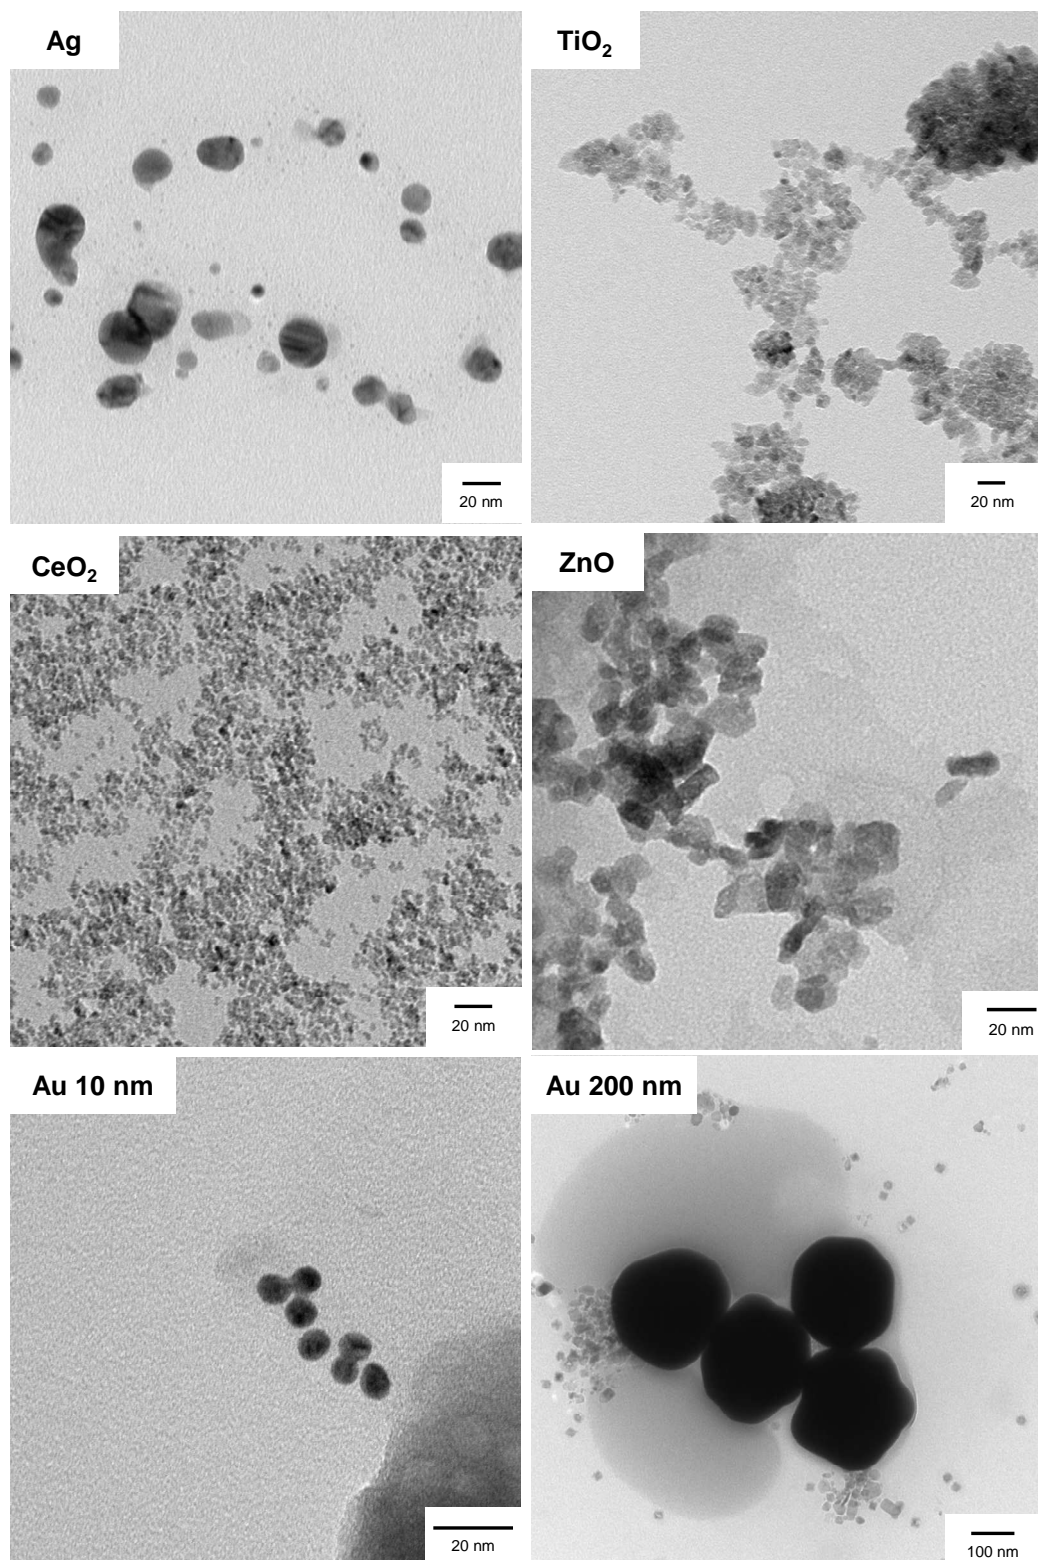

Centrifugation: calculation of the run time

The time needed for sedimentation of the silver nanoparticles was calculated in accordance to Griffith 2010 [2] and the information given in the users manual of the rotor (TH-641, Thermo Scientific, Germany). The sedimentation time was estimated as follows:

The time (T) required for sedimentation of a particle to the bottom of the tube is defined by the ratio of the clearing factor of the rotor (K) and the sedimentation coefficient (S) of the particles (Eq.1):

$$T = \frac{K}{S} \quad \text{Eq.1}$$

The K-Factor describes the relative pelleting efficiency (sedimentation of particles to the bottom of the tube) of the rotor and can be calculated as followed (Eq.2):

$$K = (253,000) \left[ \ln \left( \frac{r_{\max}}{r_{\min}} \right) \right] \div \left( \frac{\text{rotor speed}}{1,000} \right)^2 \quad \text{Eq.2}$$

The rotor speed was set to 41,000 rpm, the maximum and minimum distance between particle and the center of rotation ( $r_{\max}$  and  $r_{\min}$ ) are determined by the rotor (TH-641, Thermo Scientific, Germany) and the length of the tubes:

$$r_{\max} = 7.19 \text{ cm}$$

$$r_{\min} = 15.32 \text{ cm}$$

The sedimentation coefficient was calculated in accordance to the following equations (Eq. 3 & Eq. 4):

$$S = \frac{v}{\omega^2 \cdot r} \quad \text{Eq.3}$$

$$v = \text{sedimentation velocity of the particle [cm/s]}$$

$$\omega = \text{rotor speed in [rad/s]}$$

$$\omega = \frac{2\text{rpm}}{60}; \text{rpm} = 41,000 \quad \text{rpm} = 41,000$$

$$v = \frac{d^2(\rho_P - \rho_L)}{18 \cdot \mu} \cdot g \quad \text{Eq.4}$$

d = diameter of the particle [cm]

$\rho_P$  = density of the particle

$\rho_L$  = density of the liquid = 1 g/cm<sup>3</sup>

$\mu$  = viscosity of the liquid medium = 1.52 x 10<sup>-3</sup> Pa s

g = gravitational force; = 13.43 x 10<sup>6</sup> m/s<sup>2</sup>

$$g = \omega^2 \cdot r$$

The time required for the sedimentation of a 50 nm Ag particle in a tube of approximately 8 cm was ~1.52 days (36.5 hours, 41,000 rpm). Since particle size distribution of the Ag ENP suspension showed a certain polydispersity (refer to results and discussion). Hence, the centrifugation time was prolonged to 48 hours to ensure the sedimentation of smaller particles. Moreover, only the upper ~1 cm from the surface of the liquid within the centrifugation tube was sampled.

**Fig. S2.** Time dependant dissolution during dialysis

Dissolution of  $\text{Ag}^+$  from Ag ENP suspension of three samples (diamond, square and triangle) over a period of 29 days.

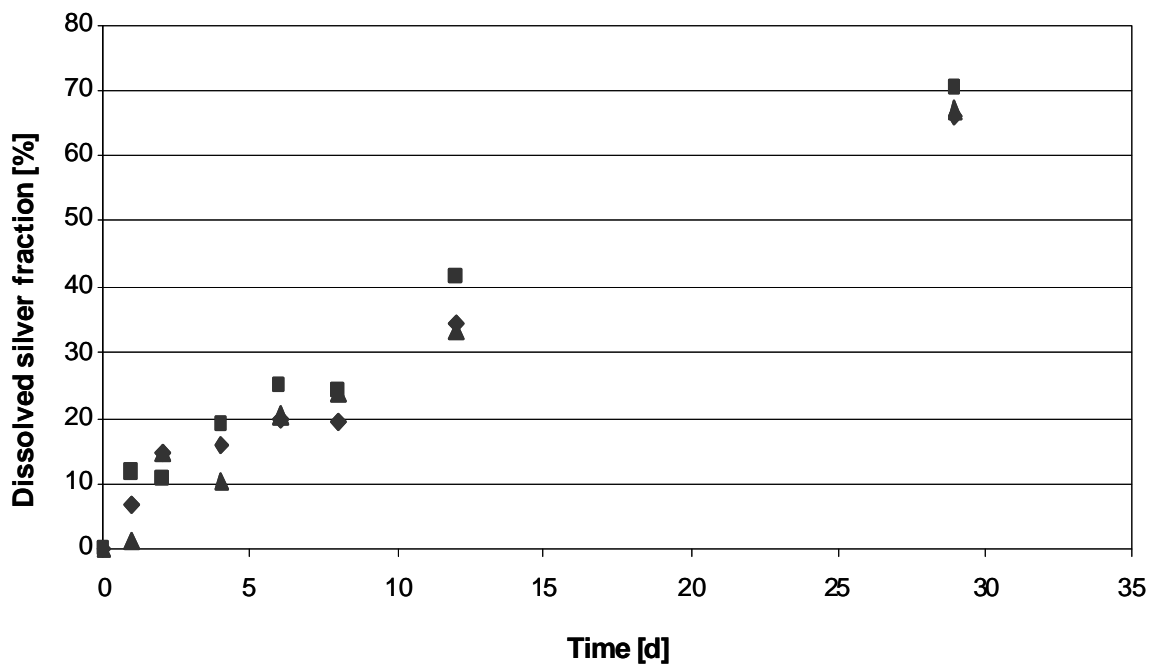



Calibration and results of the standard addition in ion selective electrode measurements

**Table S4.** Calibration of the silver ion selective electrode was conducted within a concentration range of 0.1 mg/L to 100 mg/L (values measured)

| Concentration | log (Concentration) | Voltage [mV] |
|---------------|---------------------|--------------|
| Ag [mg/l]     | log(Ag)             | U [mV]       |
| 0.1           | -1.00               | 261          |
| 0.2           | -0.70               | 266          |
| 0.5           | -0.30               | 278          |
| 1             | 0.00                | 301          |
| 2             | 0.30                | 317          |
| 5             | 0.70                | 341          |
| 10            | 1.00                | 359          |
| 20            | 1.30                | 376          |
| 50            | 1.70                | 398          |
| 100           | 2.00                | 413          |

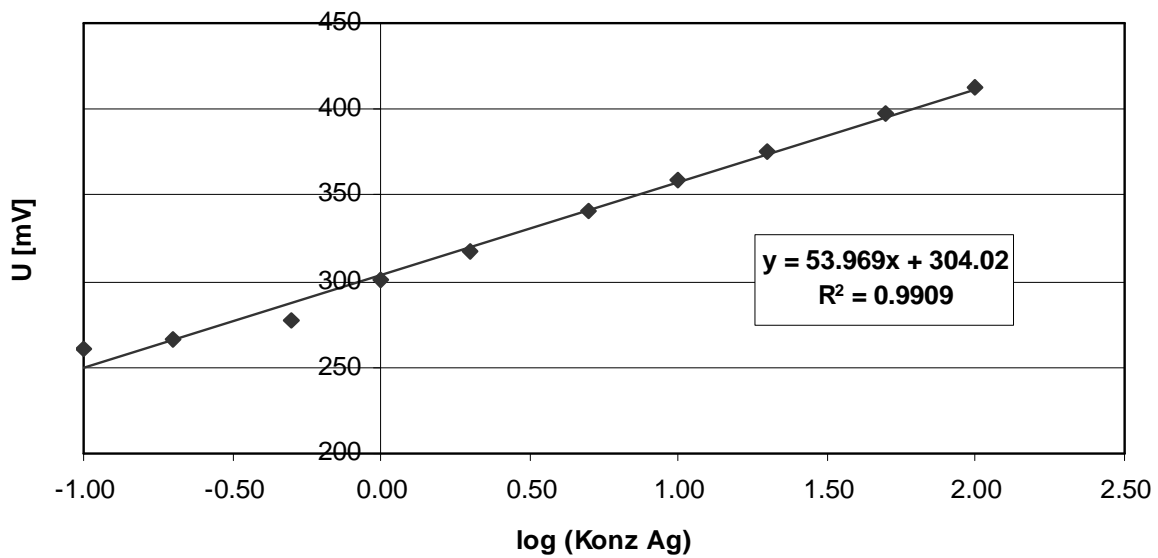

**Fig. S3.** Calibration curve of ISE

**Table S5.** Prior to further measurements, the response of the electrode was tested by a standard addition procedure. A Ag ENP working suspension (WS 1:10,000 dilution of the stock suspension) was spiked with a ICP element standard solution of different concentrations (see below). The concentration of dissolved silver determined by ISE was calculated on basis of the equation of the calibration curve. After blank correction, the recoveries were calculated on the basis of the concentrations of the Ag element standard added

|                        | <b>Voltage</b> | <b>Concentration</b>   | <b>Blank correction</b> | <b>Recovery</b> |
|------------------------|----------------|------------------------|-------------------------|-----------------|
|                        | U [mV]         | Ag <sup>+</sup> [mg/L] |                         | [%]             |
| WS + 0 mg/L Ag (blank) | 272            | 0.26                   |                         |                 |
| WS + 1 mg/L Ag         | 309            | 1.24                   | 0.98                    | 98.16%          |
| WS + 2 mg/L Ag         | 321            | 2.06                   | 1.81                    | 90.43%          |
| WS + 5 mg/L Ag         | 342            | 5.06                   | 4.80                    | 96.00%          |
| WS + 10 mg/L Ag        | 359            | 10.44                  | 10.19                   | 101.86%         |
| WS + 20 mg/L Ag        | 375            | 20.66                  | 20.41                   | 102.04%         |
| WS + 50 mg/L Ag        | 396            | 50.62                  | 50.36                   | 100.73%         |

## References

1. Lewis, D.J., et al., *Luminescent nanobeads: attachment of surface reactive Eu(III) complexes to gold nanoparticles*. Chemical Communications, 2006(13): p. 1433-1435.
2. Griffith, O.M., *Practical Techniques for Centrifugal Separations*. Thermo Fisher Scientific; Application guide, 2010.
